# Supplementary material for: Regulation of Noncoding Transcriptome in Developing Photoreceptors by Rod Differentiation Factor NRL
Source: PubMed Central journal article supplement — Invest Ophthalmol Vis Sci. 2017 Sep;58(11):4422–35. doi: 10.1167/iovs.17-21805 (PMC5584472; doi:10.1167/iovs.17-21805), 2017-09

## Supplementary Figure Legends

### Figure S1. *In situ* hybridization of asRNAs.

Expression of 4 asRNAs (3 known and 1 un-annotated) and control genes in the mouse retina by in situ hybridization (ISH).

Positive control – probe designed against mouse *Ppib* gene.

Negative control - probe designed against bacterial *dapB* gene.

White punctate dots represent the signal detected by ISH probes. DAPI staining of the nucleus is shown in blue. ONL, outer nuclear layer; INL, inner nuclear layer; GCL, ganglion cell layer.

### Figure S2. GO terms enrichment analysis for genes overlapping with known and un-annotated asRNA.

GO terms associated with genes showing significant correlation score to asRNA, are presented as a bar graph. Y-axis shows individual GO terms and X-axis shows the number of genes associated with the term. Color gradient represent the p-value of the enrichment of each term, red most significant (on the top of Y-axis) to blue least significant (on the bottom of Y-axis).

### Figure S3. Additional *in situ* hybridization of lncRNAs.

Expression of additional 12 lncRNAs and control genes in the mouse retina by in situ hybridization (ISH).

White punctate dots represent the signal detected by ISH probes. DAPI staining of the nucleus is shown in blue. ONL, outer nuclear layer; INL, inner nuclear layer; GCL, ganglion cell layer.

### Figure S4. GO terms enrichment analysis for individual WGCNA modules.

GO terms associated with genes in each WGCNA module are presented as a dot graph. Y-axis shows individual GO terms and X-axis shows the WGCNA modules. Color gradient represent the FDR (false discovery rate) of the enrichment of each term, red representing low FDR and blue high. Size of each dot represents the number of genes associated with the term. GO terms are grouped by function allowing showing distinct enrichments in each cluster.

KO – S-cone like photoreceptors

WT – Rod photoreceptors

### Figure S5. qRT-PCR validation of un-annotated lncRNAs.

A. Summary delta CT values of 10 lncRNAs normalized to endogenous control gene *Htrp*.

B. Amplification plots showing the efficiency of the reaction, and similarity between triplicates.

# Supplementary Figure S1

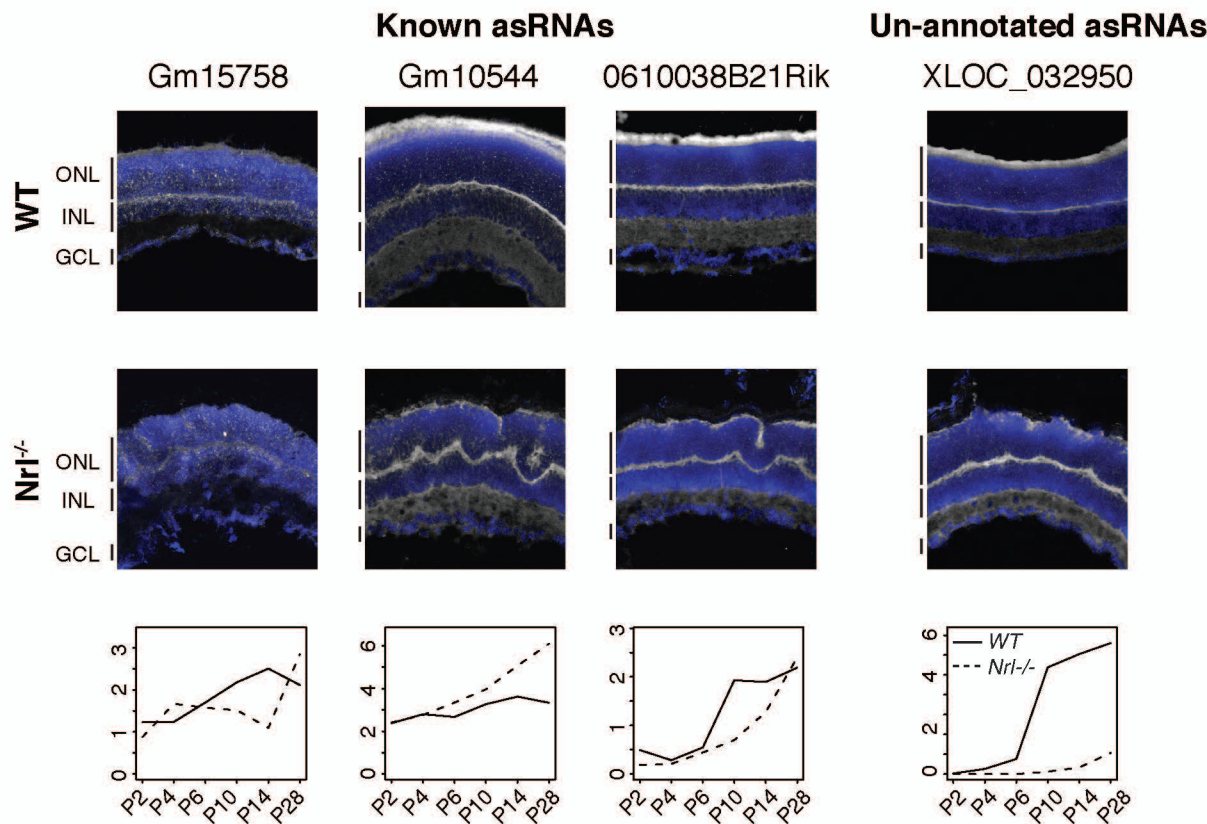

## Positive control (Ppib)

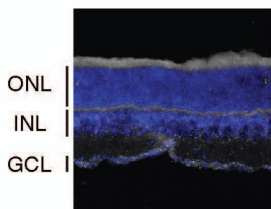

## Negative control (dapB)

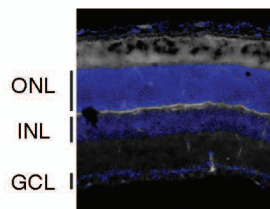

Known Antisense RNA

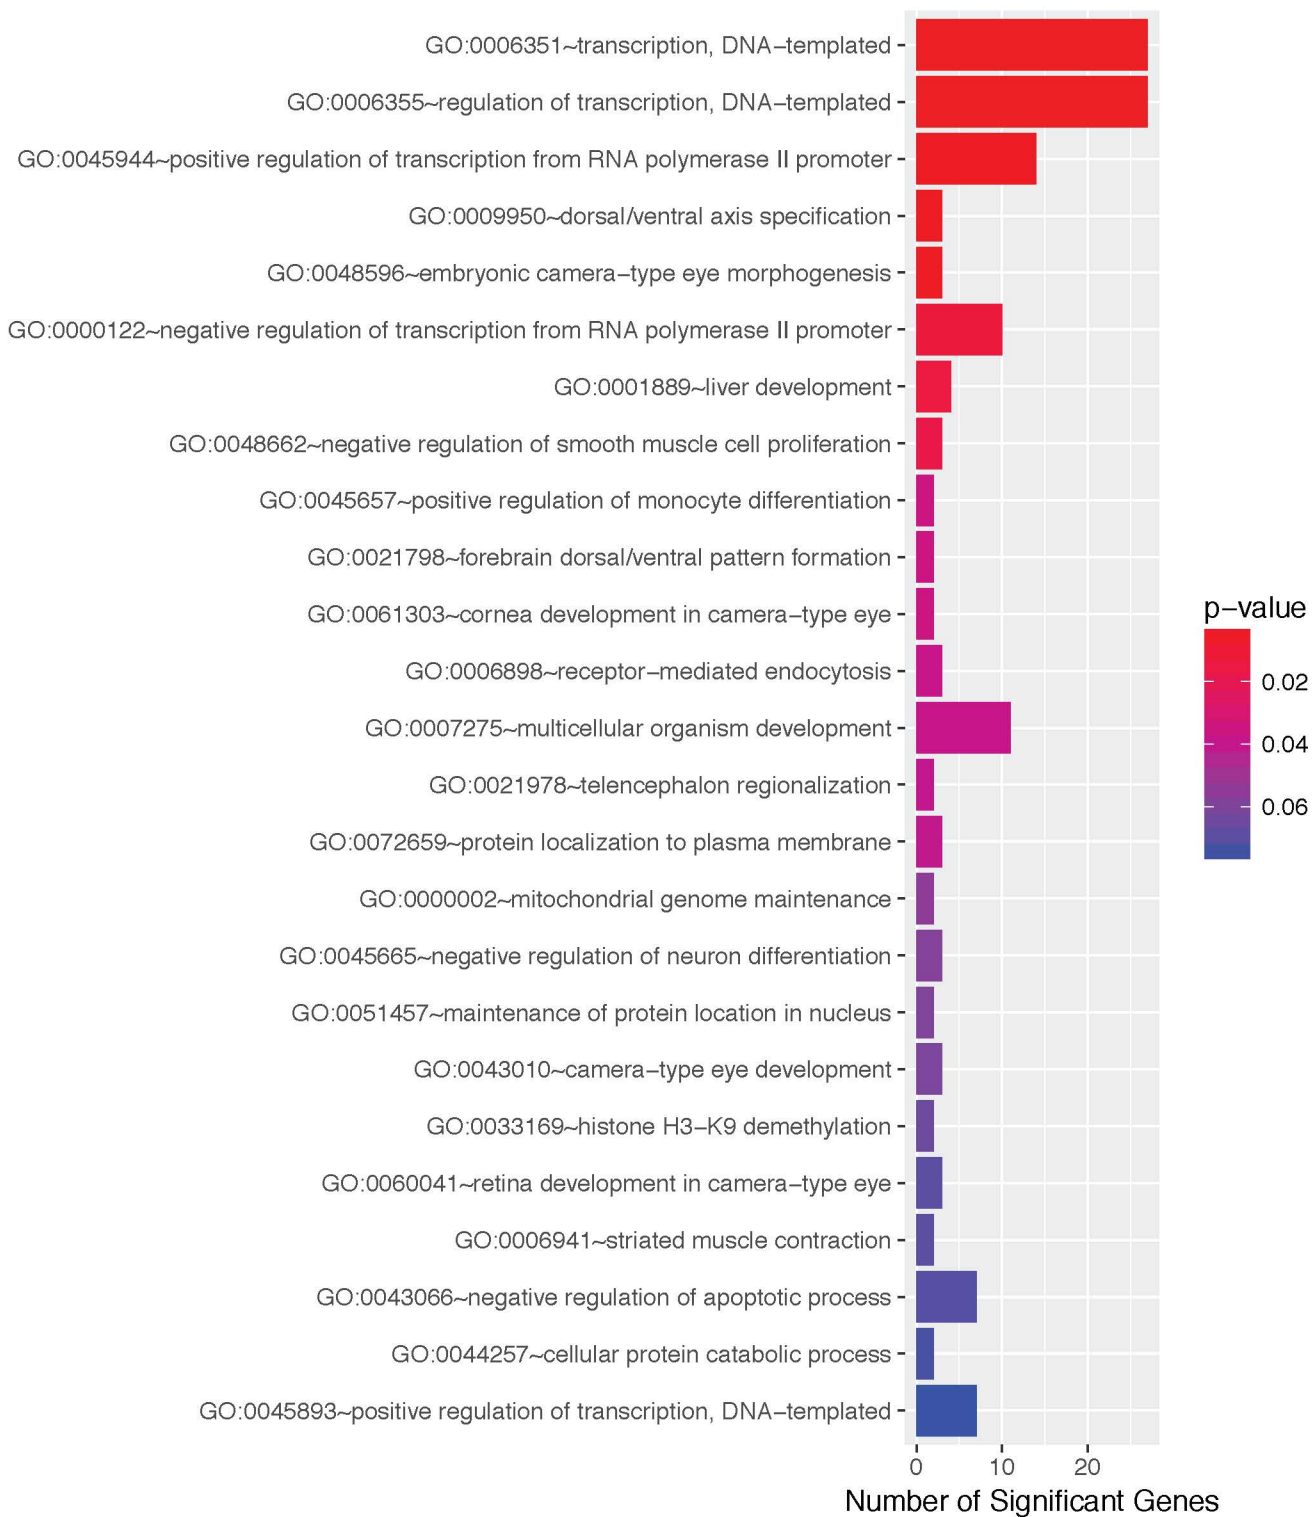

Un-annotated Antisense RNA

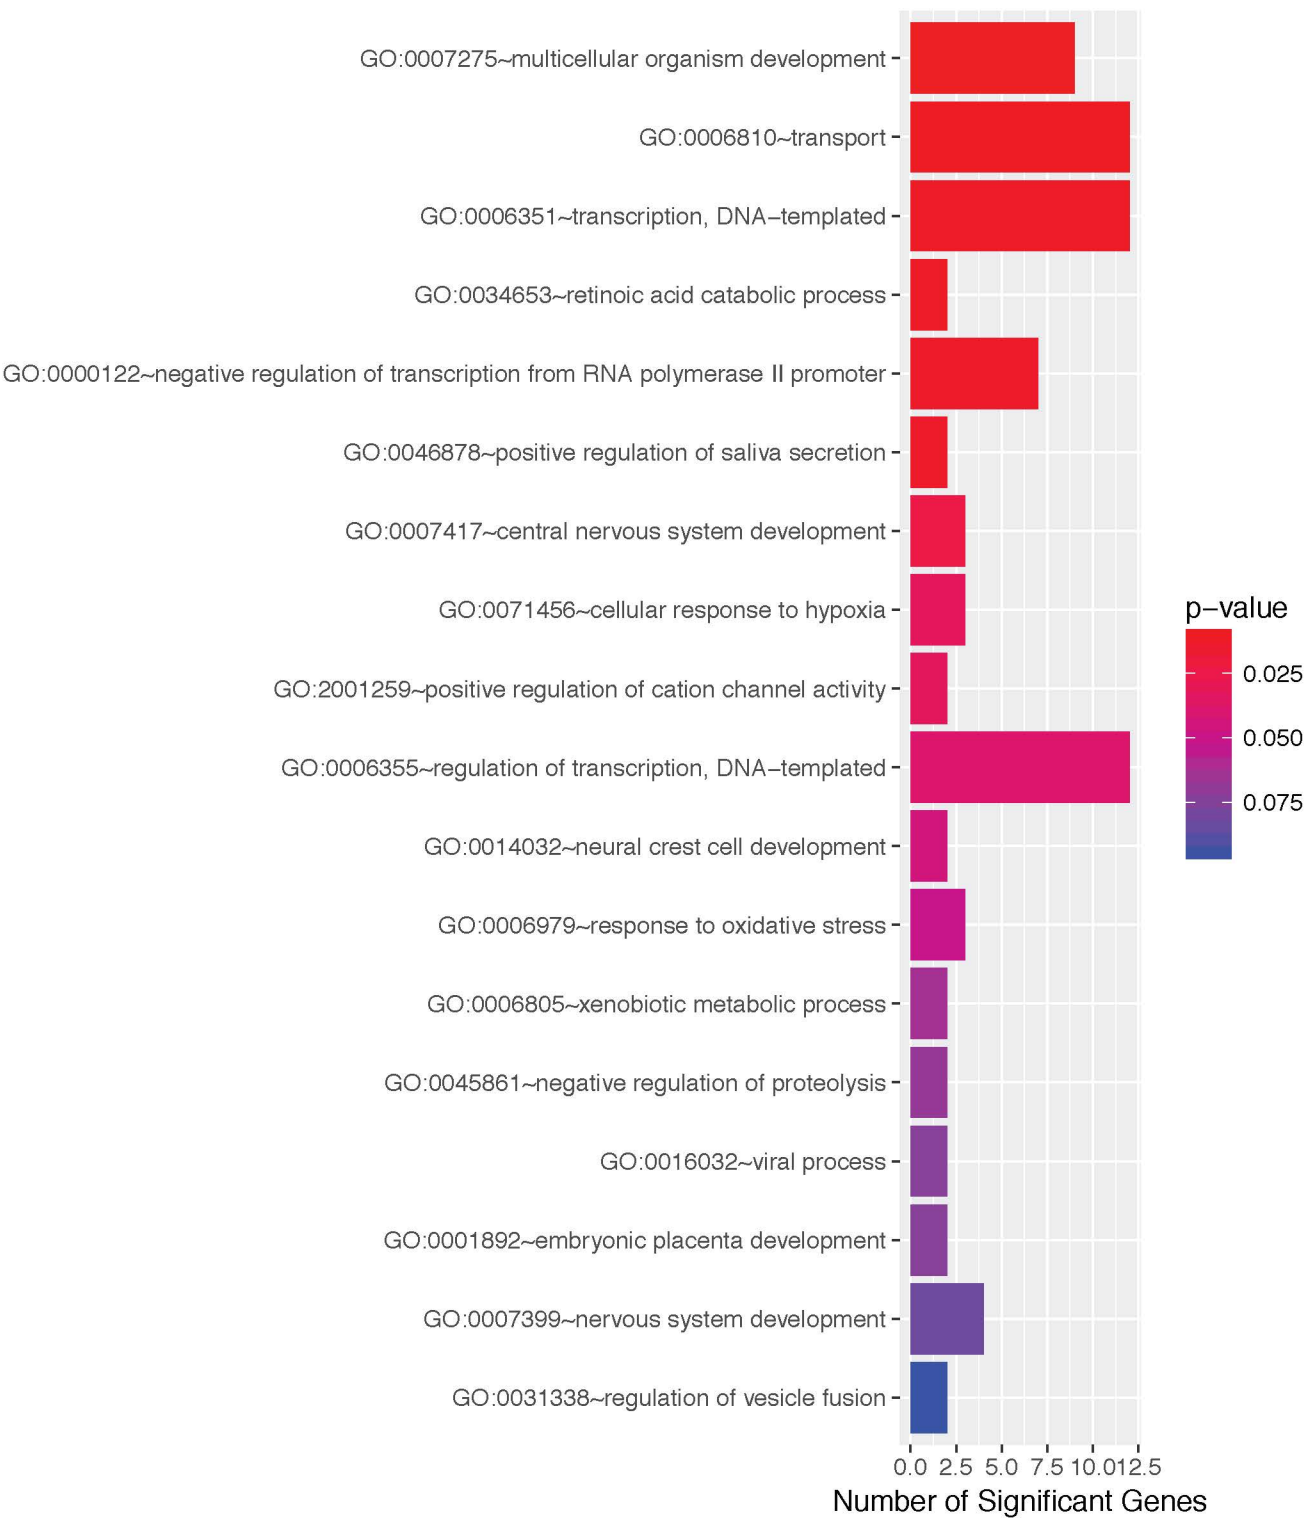

A

## Known lncRNAs

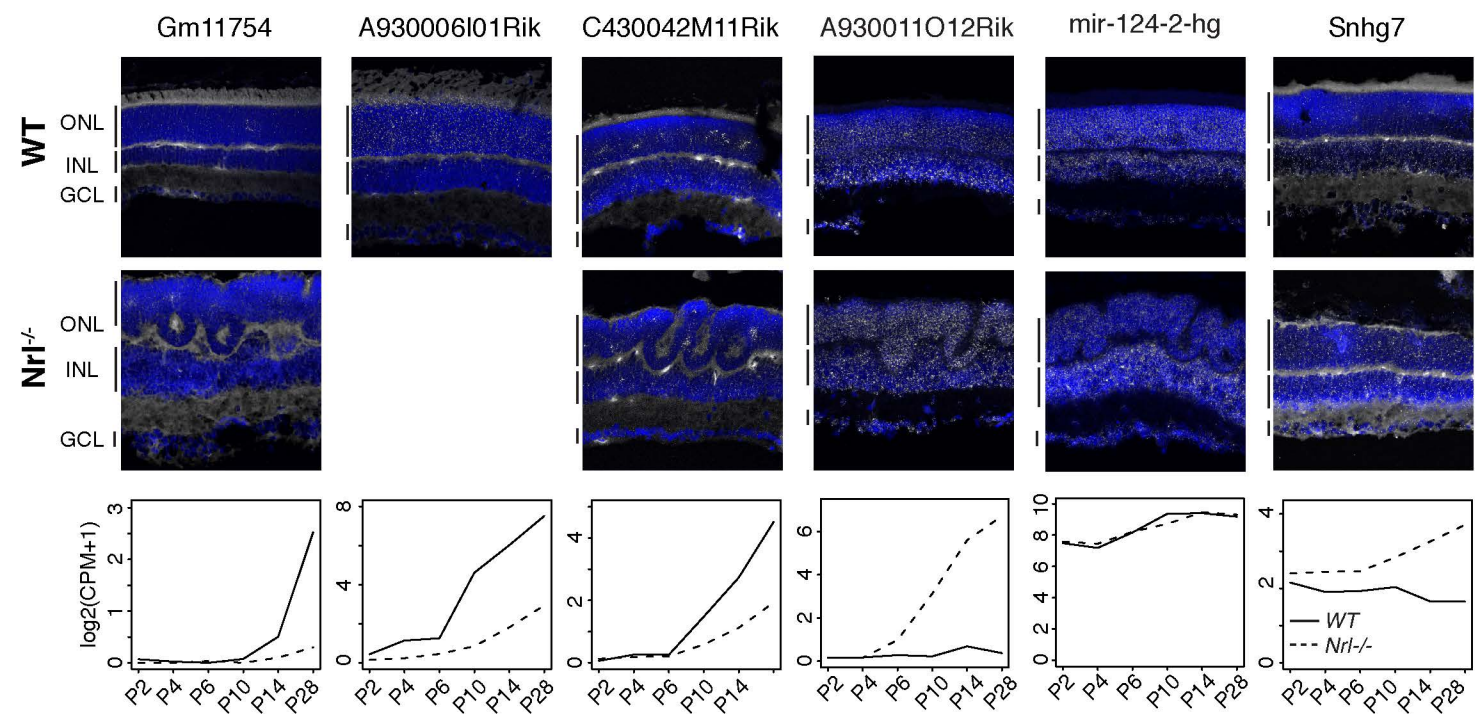

B

## Un-annotated lncRNAs

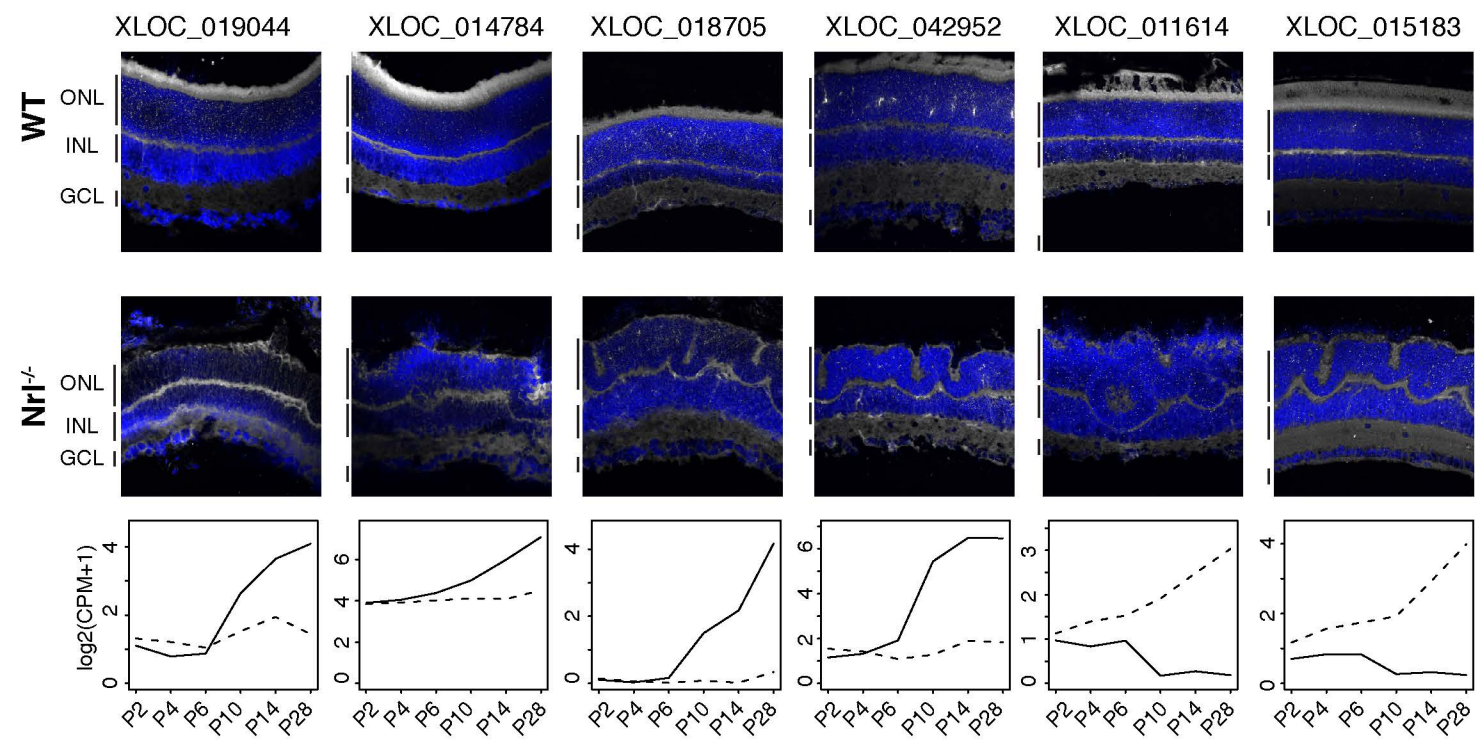



# Supplementary Figure S4

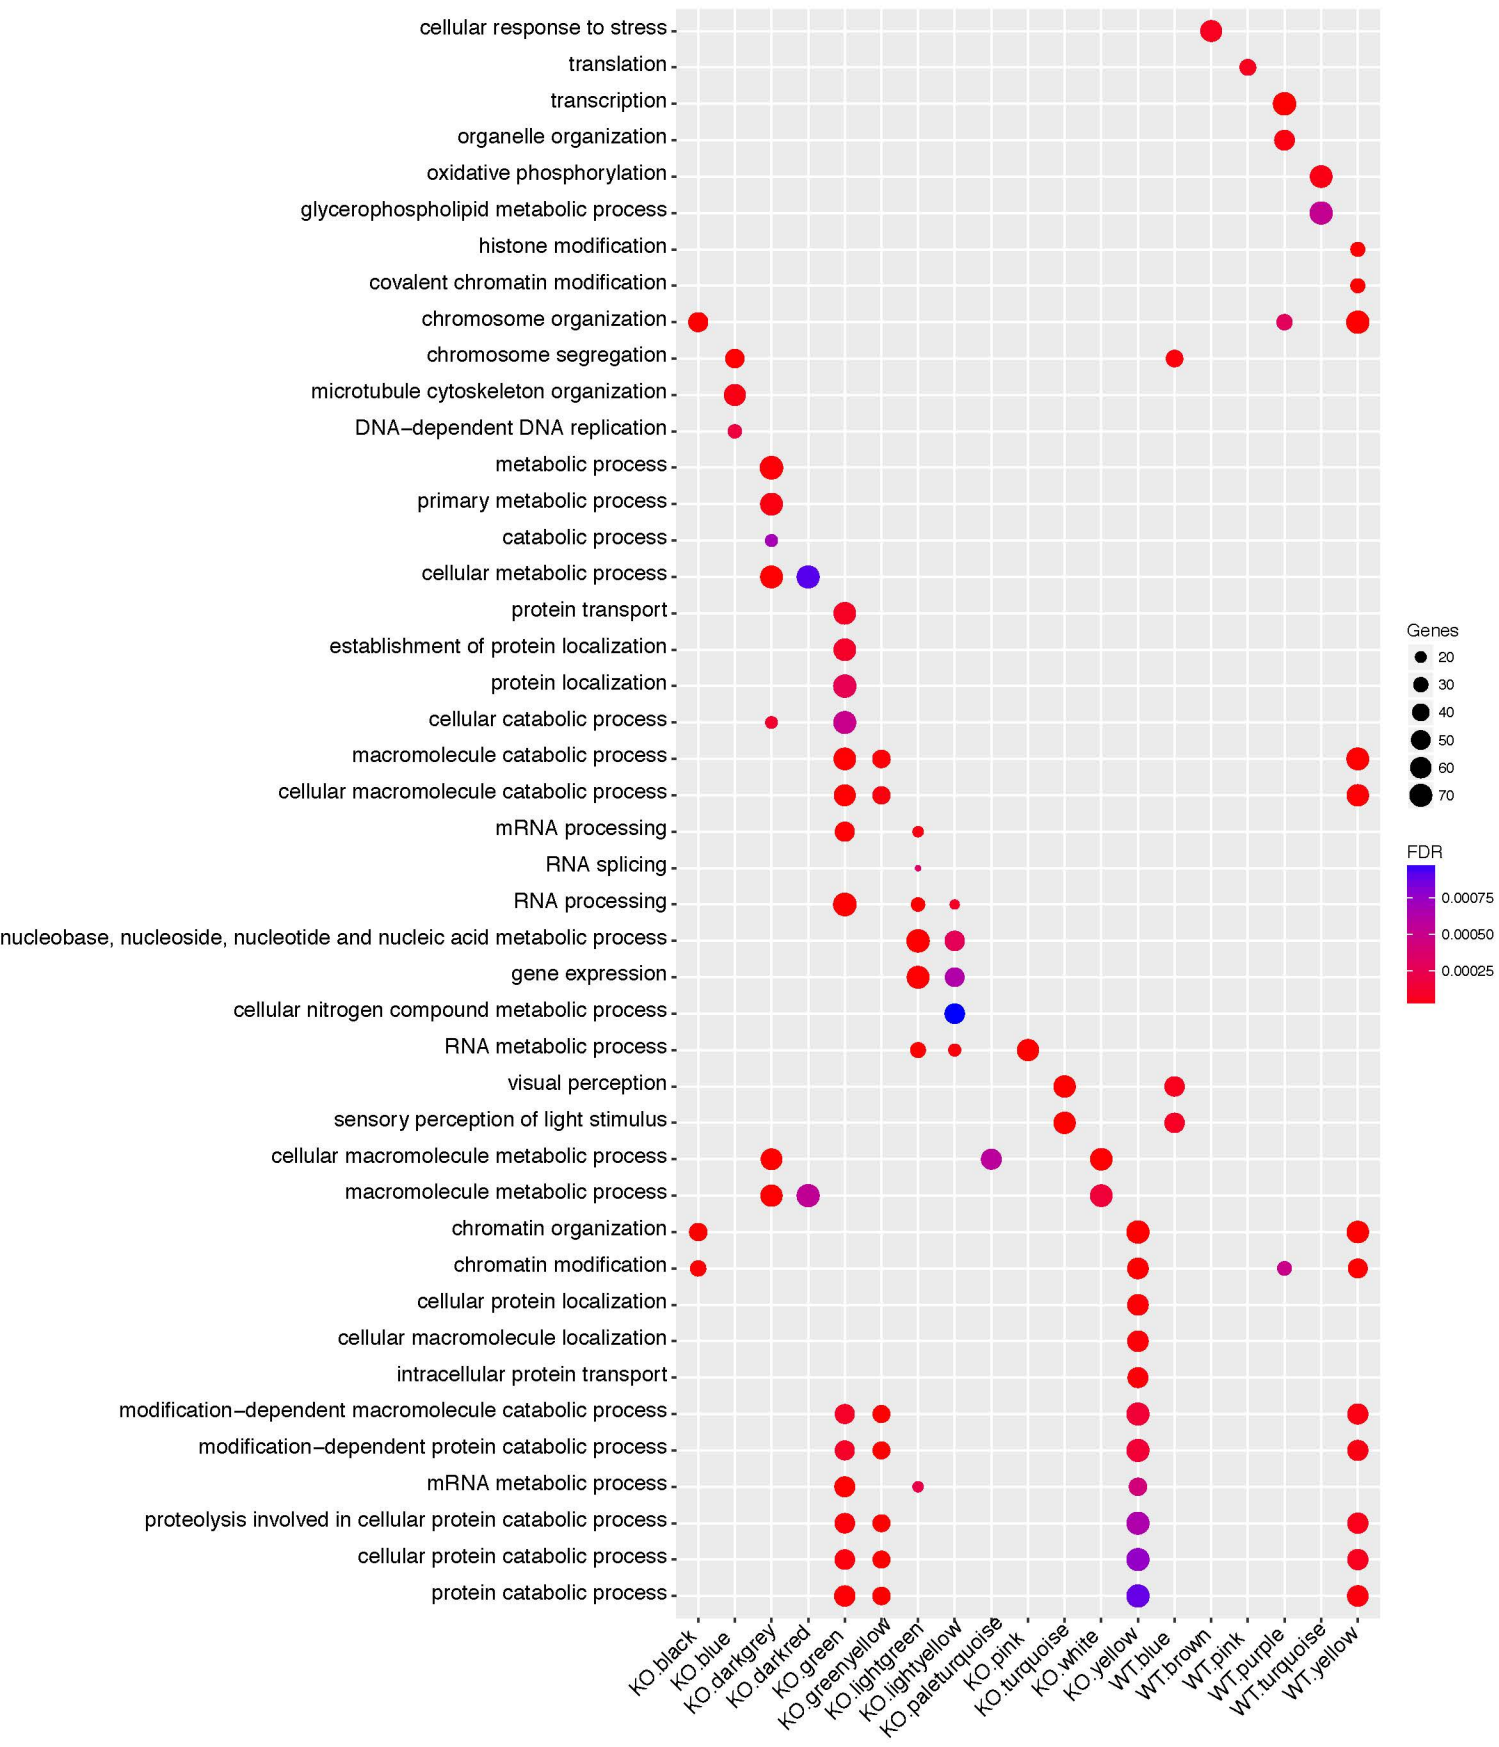

# Supplementary Figure S5

## A

|    | GeneID      | Chr | Start     | Stop      | dCT_WT_Retina |
|----|-------------|-----|-----------|-----------|---------------|
| 1  | XLOC_006814 | 10  | 118803718 | 118805307 | 6.82          |
| 2  | XLOC_067593 | 7   | 115039130 | 115050292 | 5.05          |
| 3  | XLOC_052301 | 4   | 106039767 | 106044251 | 6.83          |
| 4  | XLOC_042952 | 2   | 166352928 | 166379814 | 5.76          |
| 5  | XLOC_037508 | 19  | 8132429   | 8141474   | 9.38          |
| 6  | XLOC_025762 | 15  | 7442199   | 7456852   | 4.57          |
| 7  | XLOC_019082 | 13  | 107996336 | 108006376 | 8.31          |
| 8  | XLOC_015161 | 12  | 58923019  | 58944382  | 6.74          |
| 9  | XLOC_014784 | 12  | 102440700 | 102468126 | 4.84          |
| 10 | XLOC_018705 | 13  | 35940592  | 35951984  | 8.94          |

## B

### Amplification Plot

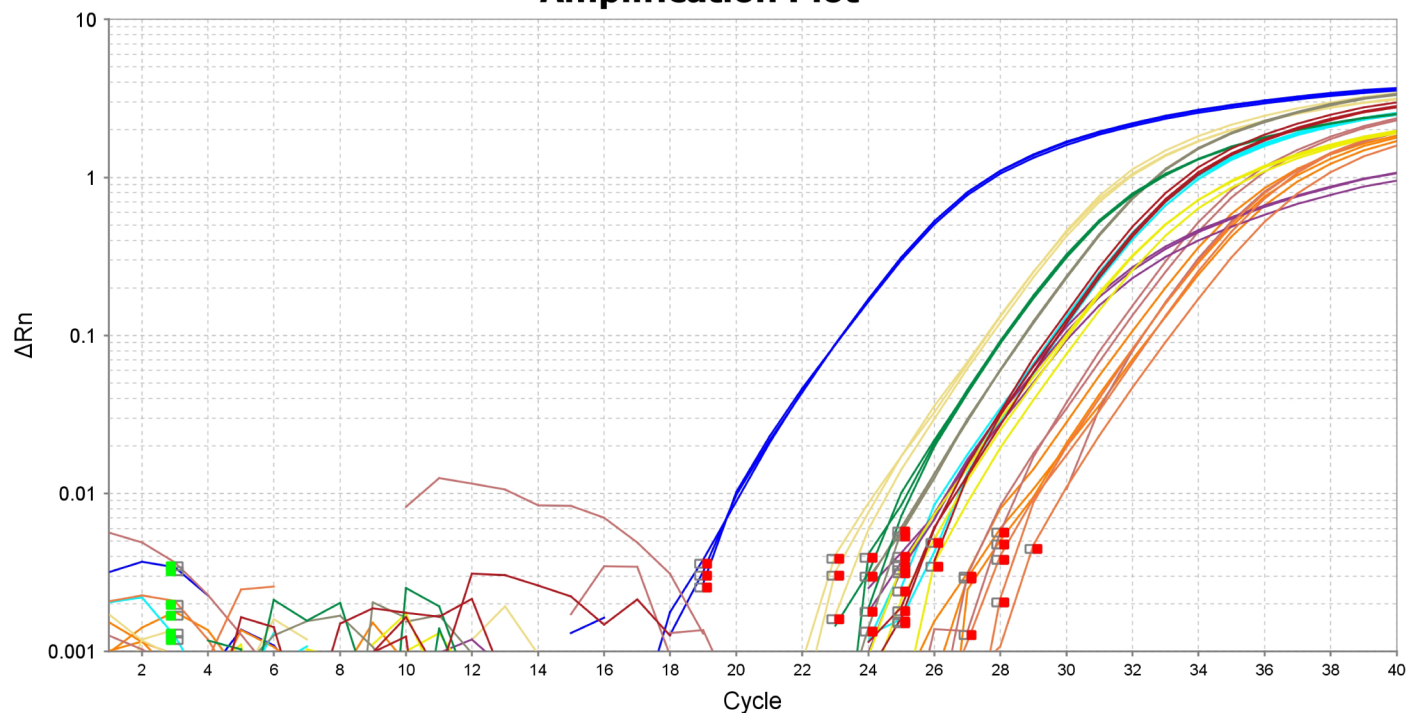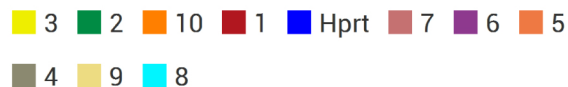

Supplement: iovs-58-10-72_s01.pdf [file iovs-58-10-72_s01.pdf]
